# Supplementary material
Source: PubMed Central journal article supplement (PMC6548519)
Supplement: NIHMS1520597-supplement-Supplementary_Information.pdf [file NIHMS1520597-supplement-Supplementary_Information.pdf]

## Supplementary Information

**Supplementary Table 1.** List of published compounds used in this study, related to **Fig. 2**.

| Compound (alternative names) | Mammalian Target | Structure                                                                           | Reference                                                                                                                                                                                           |
|------------------------------|------------------|-------------------------------------------------------------------------------------|-----------------------------------------------------------------------------------------------------------------------------------------------------------------------------------------------------|
| AA26-3                       |                  | 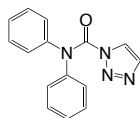   | A. Adibekian <i>et al.</i> , Click-generated triazole ureas as ultrapotent in vivo-active serine hydrolase inhibitors. <i>Nat Chem Biol</i> <b>7</b> , 469-478 (2011).                              |
| AA26-7                       |                  |    | A. Adibekian <i>et al.</i> , Click-generated triazole ureas as ultrapotent in vivo-active serine hydrolase inhibitors. <i>Nat Chem Biol</i> <b>7</b> , 469-478 (2011).                              |
| AA26-8                       |                  |    | A. Adibekian <i>et al.</i> , Click-generated triazole ureas as ultrapotent in vivo-active serine hydrolase inhibitors. <i>Nat Chem Biol</i> <b>7</b> , 469-478 (2011).                              |
| AA26-9                       |                  |    | A. Adibekian <i>et al.</i> , Click-generated triazole ureas as ultrapotent in vivo-active serine hydrolase inhibitors. <i>Nat Chem Biol</i> <b>7</b> , 469-478 (2011).                              |
| AA39-2                       | PAFAH2           |   | A. Adibekian <i>et al.</i> , Click-generated triazole ureas as ultrapotent in vivo-active serine hydrolase inhibitors. <i>Nat Chem Biol</i> <b>7</b> , 469-478 (2011).                              |
| AA39-3                       |                  |  | A. Adibekian <i>et al.</i> , Click-generated triazole ureas as ultrapotent in vivo-active serine hydrolase inhibitors. <i>Nat Chem Biol</i> <b>7</b> , 469-478 (2011).                              |
| AA44-2                       | ABHD11           |  | A. Adibekian <i>et al.</i> , Click-generated triazole ureas as ultrapotent in vivo-active serine hydrolase inhibitors. <i>Nat Chem Biol</i> <b>7</b> , 469-478 (2011).                              |
| AA74-1                       | APEH             |  | A. Adibekian <i>et al.</i> , Click-generated triazole ureas as ultrapotent in vivo-active serine hydrolase inhibitors. <i>Nat Chem Biol</i> <b>7</b> , 469-478 (2011).                              |
| ABC101                       |                  |  | R. M. Suci <i>et al.</i> , Selective Irreversible Inhibitors of the Wnt-Deacylating Enzyme NOTUM Developed by Activity-Based Protein Profiling. <i>ACS Med Chem Lett</i> <b>9</b> , 563-568 (2018). |
| ABC16                        |                  |  | A. B. Cognetta, 3rd <i>et al.</i> , Selective N-Hydroxyhydantoin Carbamate Inhibitors of Mammalian Serine Hydrolases. <i>Chem Biol</i> <b>22</b> , 928-937 (2015).                                  |

|       |                                   |                                                                                     |                                                                                                                                                                                                     |
|-------|-----------------------------------|-------------------------------------------------------------------------------------|-----------------------------------------------------------------------------------------------------------------------------------------------------------------------------------------------------|
| ABC23 | ABHD4                             | 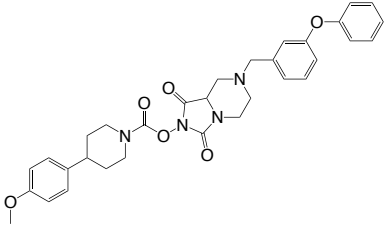   | A. B. Coggnetta, 3rd <i>et al.</i> , Selective N-Hydroxyhydantoin Carbamate Inhibitors of Mammalian Serine Hydrolases. <i>Chem Biol</i> <b>22</b> , 928-937 (2015).                                 |
| ABC28 | NOTUM                             |    | R. M. Suci <i>et al.</i> , Selective Irreversible Inhibitors of the Wnt-Deacylating Enzyme NOTUM Developed by Activity-Based Protein Profiling. <i>ACS Med Chem Lett</i> <b>9</b> , 563-568 (2018). |
| ABC34 | ABHD4,<br>PPT1,<br>PLA2G7         |    | A. B. Coggnetta, 3rd <i>et al.</i> , Selective N-Hydroxyhydantoin Carbamate Inhibitors of Mammalian Serine Hydrolases. <i>Chem Biol</i> <b>22</b> , 928-937 (2015).                                 |
| ABC37 |                                   |   | A. B. Coggnetta, 3rd <i>et al.</i> , Selective N-Hydroxyhydantoin Carbamate Inhibitors of Mammalian Serine Hydrolases. <i>Chem Biol</i> <b>22</b> , 928-937 (2015).                                 |
| ABC38 |                                   |  | A. B. Coggnetta, 3rd <i>et al.</i> , Selective N-Hydroxyhydantoin Carbamate Inhibitors of Mammalian Serine Hydrolases. <i>Chem Biol</i> <b>22</b> , 928-937 (2015).                                 |
| ABC44 | PPT1                              |  | A. B. Coggnetta, 3rd <i>et al.</i> , Selective N-Hydroxyhydantoin Carbamate Inhibitors of Mammalian Serine Hydrolases. <i>Chem Biol</i> <b>22</b> , 928-937 (2015).                                 |
| ABC45 | PPT1,<br>DDHD2,<br>LIPA,<br>ABHD4 |  | A. B. Coggnetta, 3rd <i>et al.</i> , Selective N-Hydroxyhydantoin Carbamate Inhibitors of Mammalian Serine Hydrolases. <i>Chem Biol</i> <b>22</b> , 928-937 (2015).                                 |

|       |                |                                                                                     |                                                                                                                                                                                                     |
|-------|----------------|-------------------------------------------------------------------------------------|-----------------------------------------------------------------------------------------------------------------------------------------------------------------------------------------------------|
| ABC47 | ABHD3/4        | 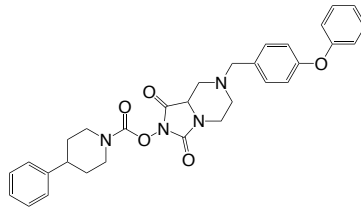   | A. B. Coggnetta, 3rd <i>et al.</i> , Selective N-Hydroxyhydantoin Carbamate Inhibitors of Mammalian Serine Hydrolases. <i>Chem Biol</i> <b>22</b> , 928-937 (2015).                                 |
| ABC5  |                |    | A. B. Coggnetta, 3rd <i>et al.</i> , Selective N-Hydroxyhydantoin Carbamate Inhibitors of Mammalian Serine Hydrolases. <i>Chem Biol</i> <b>22</b> , 928-937 (2015).                                 |
| ABC51 |                |    | A. B. Coggnetta, 3rd <i>et al.</i> , Selective N-Hydroxyhydantoin Carbamate Inhibitors of Mammalian Serine Hydrolases. <i>Chem Biol</i> <b>22</b> , 928-937 (2015).                                 |
| ABC63 | NOTUM          |   | R. M. Suci <i>et al.</i> , Selective Irreversible Inhibitors of the Wnt-Deacylating Enzyme NOTUM Developed by Activity-Based Protein Profiling. <i>ACS Med Chem Lett</i> <b>9</b> , 563-568 (2018). |
| ABC90 | NOTUM,<br>PPT1 |  | R. M. Suci <i>et al.</i> , Selective Irreversible Inhibitors of the Wnt-Deacylating Enzyme NOTUM Developed by Activity-Based Protein Profiling. <i>ACS Med Chem Lett</i> <b>9</b> , 563-568 (2018). |
| ABC91 |                |  | R. M. Suci <i>et al.</i> , Selective Irreversible Inhibitors of the Wnt-Deacylating Enzyme NOTUM Developed by Activity-Based Protein Profiling. <i>ACS Med Chem Lett</i> <b>9</b> , 563-568 (2018). |
| ABC92 | NOTUM          |  | R. M. Suci <i>et al.</i> , Selective Irreversible Inhibitors of the Wnt-Deacylating Enzyme NOTUM Developed by Activity-Based Protein Profiling. <i>ACS Med Chem Lett</i> <b>9</b> , 563-568 (2018). |
| ABC99 | NOTUM          |  | R. M. Suci <i>et al.</i> , Selective Irreversible Inhibitors of the Wnt-Deacylating Enzyme NOTUM Developed by Activity-Based Protein Profiling. <i>ACS Med Chem Lett</i> <b>9</b> , 563-568 (2018). |

|                        |              |                                                                                     |                                                                                                                                                                                                                                                  |
|------------------------|--------------|-------------------------------------------------------------------------------------|--------------------------------------------------------------------------------------------------------------------------------------------------------------------------------------------------------------------------------------------------|
| ABL127                 | PPME1        | 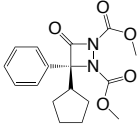   | D. A. Bachovchin <i>et al.</i> , Academic cross-fertilization by public screening yields a remarkable class of protein phosphatase methyltransferase-1 inhibitors. <i>Proc Natl Acad Sci U S A</i> <b>108</b> , 6811-6816 (2011).                |
| ABL303                 | ABHD10       |    | A. M. Zuhl <i>et al.</i> , Competitive Activity-Based Protein Profiling Identifies Aza-β-Lactams as a Versatile Chemotype for Serine Hydrolase Inhibition. <i>J Am Chem Soc</i> <b>134</b> , 5068-5071 (2012).                                   |
| AFK147 (57)            | PNPLA4       |    | A. F. Kornahrens <i>et al.</i> , Design of Benzoxathiazin-3-one 1,1-Dioxides as a New Class of Irreversible Serine Hydrolase Inhibitors: Discovery of a Uniquely Selective PNPLA4 Inhibitor. <i>J Am Chem Soc</i> <b>139</b> , 7052-7061 (2017). |
| BIA 10-2474            | FAAH         |    | A. C. M. van Esbroeck <i>et al.</i> , Activity-based protein profiling reveals off-target proteins of the FAAH inhibitor BIA 10-2474. <i>Science</i> <b>356</b> , 1084-1087 (2017).                                                              |
| BIA 10-2639            |              |    | A. C. M. van Esbroeck <i>et al.</i> , Activity-based protein profiling reveals off-target proteins of the FAAH inhibitor BIA 10-2474. <i>Science</i> <b>356</b> , 1084-1087 (2017).                                                              |
| darapladib (SB-480848) |              |   | J. A. Blackie <i>et al.</i> , The identification of clinical candidate SB-480848: a potent inhibitor of lipoprotein-associated phospholipase A2. <i>Bioorg Med Chem Lett</i> <b>13</b> , 1067-1070 (2003).                                       |
| DH376                  | DAGLa        |  | D. Ogasawara <i>et al.</i> , Rapid and profound rewiring of brain lipid signaling networks by acute diacylglycerol lipase inhibition. <i>Proc Natl Acad Sci U S A</i> <b>113</b> , 26-33 (2016).                                                 |
| DO34                   | DAGLa, DAGLb |  | D. Ogasawara <i>et al.</i> , Rapid and profound rewiring of brain lipid signaling networks by acute diacylglycerol lipase inhibition. <i>Proc Natl Acad Sci U S A</i> <b>113</b> , 26-33 (2016).                                                 |
| DO53                   |              |  | D. Ogasawara <i>et al.</i> , Rapid and profound rewiring of brain lipid signaling networks by acute diacylglycerol lipase inhibition. <i>Proc Natl Acad Sci U S A</i> <b>113</b> , 26-33 (2016).                                                 |
| JJH221                 |              |  | A. B. Cognetta, 3rd <i>et al.</i> , Selective N-Hydroxyhydantoin Carbamate Inhibitors of Mammalian Serine Hydrolases. <i>Chem Biol</i> <b>22</b> , 928-937 (2015).                                                                               |

|                  |                    |                                                                                     |                                                                                                                                                                                                                                                   |
|------------------|--------------------|-------------------------------------------------------------------------------------|---------------------------------------------------------------------------------------------------------------------------------------------------------------------------------------------------------------------------------------------------|
| JJH248           |                    | 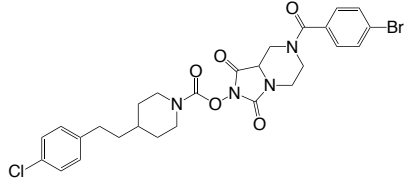   | A. B. Coggnetta, 3rd <i>et al.</i> , Selective N-Hydroxyhydantoin Carbamate Inhibitors of Mammalian Serine Hydrolases. <i>Chem Biol</i> <b>22</b> , 928-937 (2015).                                                                               |
| JJH250           |                    |    | A. B. Coggnetta, 3rd <i>et al.</i> , Selective N-Hydroxyhydantoin Carbamate Inhibitors of Mammalian Serine Hydrolases. <i>Chem Biol</i> <b>22</b> , 928-937 (2015).                                                                               |
| JJH251           | ABHD4,<br>LYPLA1/2 |    | A. B. Coggnetta, 3rd <i>et al.</i> , Selective N-Hydroxyhydantoin Carbamate Inhibitors of Mammalian Serine Hydrolases. <i>Chem Biol</i> <b>22</b> , 928-937 (2015).                                                                               |
| JJH253           |                    |    | A. B. Coggnetta, 3rd <i>et al.</i> , Selective N-Hydroxyhydantoin Carbamate Inhibitors of Mammalian Serine Hydrolases. <i>Chem Biol</i> <b>22</b> , 928-937 (2015).                                                                               |
| JJH254           | LYPLA1/2           |   | A. B. Coggnetta, 3rd <i>et al.</i> , Selective N-Hydroxyhydantoin Carbamate Inhibitors of Mammalian Serine Hydrolases. <i>Chem Biol</i> <b>22</b> , 928-937 (2015).                                                                               |
| JJH321           |                    |  | A. B. Coggnetta, 3rd <i>et al.</i> , Selective N-Hydroxyhydantoin Carbamate Inhibitors of Mammalian Serine Hydrolases. <i>Chem Biol</i> <b>22</b> , 928-937 (2015).                                                                               |
| JJH322           |                    |  | A. B. Coggnetta, 3rd <i>et al.</i> , Selective N-Hydroxyhydantoin Carbamate Inhibitors of Mammalian Serine Hydrolases. <i>Chem Biol</i> <b>22</b> , 928-937 (2015).                                                                               |
| JJH331           |                    |  | A. B. Coggnetta, 3rd <i>et al.</i> , Selective N-Hydroxyhydantoin Carbamate Inhibitors of Mammalian Serine Hydrolases. <i>Chem Biol</i> <b>22</b> , 928-937 (2015).                                                                               |
| JMN21<br>(ML256) | pPAFAH             |  | J. M. G. Nagano <i>et al.</i> , Optimization and characterization of a carbamate inhibitor for plasma platelet-activating factor acetylhydrolase (pPAFAH). <i>Probe Reports from the NIH Molecular Libraries Program</i> . (Bethesda (MD), 2011). |

|                  |          |                                                                                     |                                                                                                                                                                                                                                      |
|------------------|----------|-------------------------------------------------------------------------------------|--------------------------------------------------------------------------------------------------------------------------------------------------------------------------------------------------------------------------------------|
| JT271-3 (4j)     | ABHD3    | 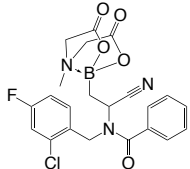   | J. Tan et al., Multicomponent mapping of boron chemotypes furnishes selective enzyme inhibitors. <i>Nat Commun</i> <b>8</b> , 1760 (2017).                                                                                           |
| JW1036           |          |    | J. W. Chang et al., Selective inhibitor of platelet-activating factor acetylhydrolases 1b2 and 1b3 that impairs cancer cell survival. <i>ACS Chem Biol</i> <b>10</b> , 925-932 (2015).                                               |
| JW1038           |          |    | J. W. Chang et al., Selective inhibitor of platelet-activating factor acetylhydrolases 1b2 and 1b3 that impairs cancer cell survival. <i>ACS Chem Biol</i> <b>10</b> , 925-932 (2015).                                               |
| JW1039           |          |    | J. W. Chang et al., Selective inhibitor of platelet-activating factor acetylhydrolases 1b2 and 1b3 that impairs cancer cell survival. <i>ACS Chem Biol</i> <b>10</b> , 925-932 (2015).                                               |
| JW480            | KIAA1363 |    | J. W. Chang, D. K. Nomura, B. F. Cravatt, A potent and selective inhibitor of KIAA1363/AADACL1 that impairs prostate cancer pathogenesis. <i>Chem Biol</i> <b>18</b> , 476-484 (2011).                                               |
| JW651            | MGLL     |   | J. W. Chang, A. B. Cognetta, 3rd, M. J. Niphakis, B. F. Cravatt, Proteome-wide reactivity profiling identifies diverse carbamate chemotypes tuned for serine hydrolase inhibition. <i>ACS Chem Biol</i> <b>8</b> , 1590-1599 (2013). |
| JZL184           | MGLL     |  | J. Z. Long et al., Selective blockade of 2-arachidonoylglycerol hydrolysis produces cannabinoid behavioral effects. <i>Nat Chem Biol</i> <b>5</b> , 37-44 (2009).                                                                    |
| KC01 (KC-6-30-1) | BAT5     |  | S. S. Kamat et al., Immunomodulatory lysophosphatidylserines are regulated by ABHD16A and ABHD12 interplay. <i>Nat Chem Biol</i> <b>11</b> , 164-171 (2015).                                                                         |
| KC02 (ML1-80-3)  |          |  | S. S. Kamat et al., Immunomodulatory lysophosphatidylserines are regulated by ABHD16A and ABHD12 interplay. <i>Nat Chem Biol</i> <b>11</b> , 164-171 (2015).                                                                         |

|                     |       |                                                                                     |                                                                                                                                                                                                                |
|---------------------|-------|-------------------------------------------------------------------------------------|----------------------------------------------------------------------------------------------------------------------------------------------------------------------------------------------------------------|
| KC03<br>(KC6-169-5) |       | 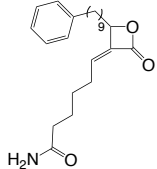   | S. S. Kamat <i>et al.</i> , Immunomodulatory lysophosphatidylserines are regulated by ABHD16A and ABHD12 interplay. <i>Nat Chem Biol</i> <b>11</b> , 164-171 (2015).                                           |
| KC05<br>(KC6-111-3) |       |    | S. S. Kamat <i>et al.</i> , Immunomodulatory lysophosphatidylserines are regulated by ABHD16A and ABHD12 interplay. <i>Nat Chem Biol</i> <b>11</b> , 164-171 (2015).                                           |
| KC07<br>(KC6-53-5)  |       |    | S. S. Kamat <i>et al.</i> , Immunomodulatory lysophosphatidylserines are regulated by ABHD16A and ABHD12 interplay. <i>Nat Chem Biol</i> <b>11</b> , 164-171 (2015).                                           |
| KLH40               |       |    | J. M. Inloes <i>et al.</i> , The hereditary spastic paraplegia-related enzyme DDHD2 is a principal brain triglyceride lipase. <i>Proc Natl Acad Sci U S A</i> <b>111</b> , 14924-14929 (2014).                 |
| KLH45b              | DDHD2 |   | J. M. Inloes <i>et al.</i> , The hereditary spastic paraplegia-related enzyme DDHD2 is a principal brain triglyceride lipase. <i>Proc Natl Acad Sci U S A</i> <b>111</b> , 14924-14929 (2014).                 |
| KLH46 (36)          |       |  | K. L. Hsu <i>et al.</i> , Development and optimization of piperidyl-1,2,3-triazole ureas as selective chemical probes of endocannabinoid biosynthesis. <i>J Med Chem</i> <b>56</b> , 8257-8269 (2013).         |
| KML29               | MGLL  |  | J. W. Chang <i>et al.</i> , Highly selective inhibitors of monoacylglycerol lipase bearing a reactive group that is bioisosteric with endocannabinoid substrates. <i>Chem Biol</i> <b>19</b> , 579-588 (2012). |
| KT109               | DAGLb |  | K. L. Hsu <i>et al.</i> , DAGLbeta inhibition perturbs a lipid network involved in macrophage inflammatory responses. <i>Nat Chem Biol</i> <b>8</b> , 999-1007 (2012).                                         |
| KT116               |       |  | K. L. Hsu <i>et al.</i> , DAGLbeta inhibition perturbs a lipid network involved in macrophage inflammatory responses. <i>Nat Chem Biol</i> <b>8</b> , 999-1007 (2012).                                         |
| KT117               |       |  | K. L. Hsu <i>et al.</i> , DAGLbeta inhibition perturbs a lipid network involved in macrophage inflammatory responses. <i>Nat Chem Biol</i> <b>8</b> , 999-1007 (2012).                                         |

|            |                 |  |                                                                                                                                                                                                                                                 |
|------------|-----------------|--|-------------------------------------------------------------------------------------------------------------------------------------------------------------------------------------------------------------------------------------------------|
| KT172      | DAGLa,<br>DAGLb |  | K. L. Hsu <i>et al.</i> , DAGLbeta inhibition perturbs a lipid network involved in macrophage inflammatory responses. <i>Nat Chem Biol</i> <b>8</b> , 999-1007 (2012).                                                                          |
| KT185      |                 |  | K. L. Hsu <i>et al.</i> , Discovery and optimization of piperidyl-1,2,3-triazole ureas as potent, selective, and in vivo-active inhibitors of alpha/beta-hydrolase domain containing 6 (ABHD6). <i>J Med Chem</i> <b>56</b> , 8270-8279 (2013). |
| KT186 (10) |                 |  | K. L. Hsu <i>et al.</i> , Development and optimization of piperidyl-1,2,3-triazole ureas as selective chemical probes of endocannabinoid biosynthesis. <i>J Med Chem</i> <b>56</b> , 8257-8269 (2013).                                          |
| KT195      | ABHD6           |  | K. L. Hsu <i>et al.</i> , DAGLbeta inhibition perturbs a lipid network involved in macrophage inflammatory responses. <i>Nat Chem Biol</i> <b>8</b> , 999-1007 (2012).                                                                          |
| KT203      | ABHD6           |  | K. L. Hsu <i>et al.</i> , Discovery and optimization of piperidyl-1,2,3-triazole ureas as potent, selective, and in vivo-active inhibitors of alpha/beta-hydrolase domain containing 6 (ABHD6). <i>J Med Chem</i> <b>56</b> , 8270-8279 (2013). |
| MJN110     | MGLL            |  | M. J. Niphakis <i>et al.</i> , Evaluation of NHS carbamates as a potent and selective class of endocannabinoid hydrolase inhibitors. <i>ACS Chem Neurosci</i> <b>4</b> , 1322-1332 (2013).                                                      |
| MJN193     | ABHD6           |  | A. B. Coggnetta, 3rd <i>et al.</i> , Selective N-Hydroxyhydantoin Carbamate Inhibitors of Mammalian Serine Hydrolases. <i>Chem Biol</i> <b>22</b> , 928-937 (2015).                                                                             |
| MJN200     | ABHD6           |  | A. B. Coggnetta, 3rd <i>et al.</i> , Selective N-Hydroxyhydantoin Carbamate Inhibitors of Mammalian Serine Hydrolases. <i>Chem Biol</i> <b>22</b> , 928-937 (2015).                                                                             |
| MJN202     |                 |  | A. B. Coggnetta, 3rd <i>et al.</i> , Selective N-Hydroxyhydantoin Carbamate Inhibitors of Mammalian Serine Hydrolases. <i>Chem Biol</i> <b>22</b> , 928-937 (2015).                                                                             |
| P11        | PAFAH1b2/3      |  | J. W. Chang <i>et al.</i> , Selective inhibitor of platelet-activating factor acetylhydrolases 1b2 and 1b3 that impairs cancer cell survival. <i>ACS Chem Biol</i> <b>10</b> , 925-932 (2015).                                                  |



|                           |                  |                                                                                     |                                                                                                                                                                                                                            |
|---------------------------|------------------|-------------------------------------------------------------------------------------|----------------------------------------------------------------------------------------------------------------------------------------------------------------------------------------------------------------------------|
| Palmostatin B<br>(Palm B) | APT1/2           | 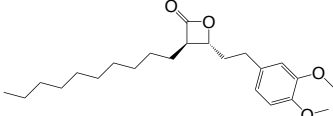   | F. J. Dekker <i>et al.</i> , Small-molecule inhibition of APT1 affects Ras localization and signaling. <i>Nat Chem Biol</i> <b>6</b> , 449-456 (2010).                                                                     |
| Palmostatin M<br>(Palm M) | APT1/2           |    | C. Hedberg <i>et al.</i> , Development of highly potent inhibitors of the Ras-targeting human acyl protein thioesterases based on substrate similarity design. <i>Angew Chem Int Ed Engl</i> <b>50</b> , 9832-9837 (2011). |
| PF-04457845               | FAAH             |    | D. S. Johnson <i>et al.</i> , Discovery of PF-04457845: A Highly Potent, Orally Bioavailable, and Selective Urea FAAH Inhibitor. <i>ACS Med Chem Lett</i> <b>2</b> , 91-96 (2011).                                         |
| THL                       | LIPF, PNLIP, CEL |    | B. Borgstrom, Mode of action of tetrahydrolipstatin: a derivative of the naturally occurring lipase inhibitor lipstatin. <i>Biochim Biophys Acta</i> <b>962</b> , 308-316 (1988).                                          |
| URB597                    | FAAH             |   | S. Kathuria, <i>et al.</i> Modulation of anxiety through blockade of anandamide hydrolysis. <i>Nat Med</i> <b>9</b> , 76-81 (2003).                                                                                        |
| WWL229                    | CES1D            |  | E. Dominguez <i>et al.</i> , Integrated phenotypic and activity-based profiling links Ces3 to obesity and diabetes. <i>Nat Chem Biol</i> <b>10</b> , 113-121 (2014).                                                       |

**Supplementary Table 2.** 2-AG and AEA hydrolase activities of recombinant proteins following DMSO or JZL184 treatment (50  $\mu$ M, 30 min pre-treatment) as quantified by LC-MS/MS, related to **Fig. 5** and **Supplementary Fig. 9**. Statistics were performed using two-sided Mann-Whitney test.

| Protein                               | Species<br>(substrate, product) | Treatment                  |                             |                            |                             | p-value<br>(DMSO<br>vs 50 $\mu$ M<br>JZL184) | p-value<br>(METAP2<br>+ DMSO<br>vs protein<br>+ DMSO) |
|---------------------------------------|---------------------------------|----------------------------|-----------------------------|----------------------------|-----------------------------|----------------------------------------------|-------------------------------------------------------|
|                                       |                                 | DMSO                       |                             | 50 $\mu$ M JZL184          |                             |                                              |                                                       |
|                                       |                                 | Mean<br>(pmol<br>/min /mg) | SE<br>(pmol<br>/min<br>/mg) | Mean<br>(pmol<br>/min /mg) | SE<br>(pmol<br>/min<br>/mg) |                                              |                                                       |
| METAP2 (n = 8)                        | 2-AG (20:4), AA (20:4)          | 85.2                       | 13.645                      | 73.5                       | 13.505                      | 2.79E-01                                     |                                                       |
| FAAH-1 (n = 6)                        | 2-AG (20:4), AA (20:4)          | 108.8                      | 24.215                      | 101.6                      | 23.056                      | 8.18E-01                                     | 4.14E-01                                              |
| FAAH-2 (n = 6)                        | 2-AG (20:4), AA (20:4)          | 102.4                      | 18.818                      | 91.1                       | 17.074                      | 4.85E-01                                     | 4.14E-01                                              |
| FAAH-3 (n = 4)                        | 2-AG (20:4), AA (20:4)          | 214.1                      | 41.463                      | 152.7                      | 51.213                      | 3.43E-01                                     | 1.62E-02                                              |
| FAAH-4 (n = 8)                        | 2-AG (20:4), AA (20:4)          | 1200.8                     | 209.728                     | 121.2                      | 24.812                      | 1.55E-04                                     | 1.55E-04                                              |
| FAAH-5 (n = 6)                        | 2-AG (20:4), AA (20:4)          | 90.9                       | 13.387                      | 79.5                       | 11.493                      | 3.10E-01                                     | 4.14E-01                                              |
| FAAH-6 (n = 6)                        | 2-AG (20:4), AA (20:4)          | 103.0                      | 20.003                      | 88.8                       | 19.812                      | 4.85E-01                                     | 8.52E-01                                              |
| Y41D4A.6 (n = 4)                      | 2-AG (20:4), AA (20:4)          | 81.7                       | 14.314                      | 60.7                       | 14.042                      | 3.71E-01                                     | >0.999999                                             |
| Y53F4B.18 (n = 6)                     | 2-AG (20:4), AA (20:4)          | 111.2                      | 51.224                      | 45.2                       | 8.432                       | 2.40E-01                                     | 5.73E-01                                              |
| METAP2 (n = 8)                        | AEA (20:4), AA (20:4)           | 1.0                        | 0.328                       | 0.8                        | 0.191                       | 8.78E-01                                     |                                                       |
| FAAH-1 (n = 6)                        | AEA (20:4), AA (20:4)           | 18.3                       | 4.262                       | 10.2                       | 2.060                       | 1.32E-01                                     | 6.66E-04                                              |
| FAAH-2 (n = 6)                        | AEA (20:4), AA (20:4)           | 6.7                        | 2.614                       | 5.6                        | 1.944                       | 9.37E-01                                     | 7.99E-03                                              |
| FAAH-3 (n = 4)                        | AEA (20:4), AA (20:4)           | 20.5                       | 4.985                       | 17.7                       | 4.517                       | 6.86E-01                                     | 4.04E-03                                              |
| FAAH-4 (n = 8)                        | AEA (20:4), AA (20:4)           | 19.4                       | 4.648                       | 1.7                        | 0.408                       | 3.11E-04                                     | 1.55E-04                                              |
| FAAH-5 (n = 6)                        | AEA (20:4), AA (20:4)           | 1.7                        | 0.460                       | 1.0                        | 0.125                       | 3.10E-01                                     | 2.82E-01                                              |
| FAAH-6 (n = 6)                        | AEA (20:4), AA (20:4)           | 0.8                        | 0.217                       | 1.0                        | 0.428                       | 8.59E-01                                     | 9.50E-01                                              |
| Y41D4A.6 (n = 4)                      | AEA (20:4), AA (20:4)           | 0.9                        | 0.292                       | 0.7                        | 0.180                       | 8.86E-01                                     | >0.999999                                             |
| Y53F4B.18 (n = 4)                     | AEA (20:4), AA (20:4)           | 23.0                       | 6.070                       | 1.3                        | 0.379                       | 2.86E-02                                     | 4.04E-03                                              |
| METAP2 (n = 4)                        | 2-AG (20:4), AA (20:4)          | 87.4                       | 12.329                      | 74.9                       | 12.127                      | 2.00E-01                                     |                                                       |
| F13H6.13 (n = 4)                      | 2-AG (20:4), AA (20:4)          | 166.8                      | 23.495                      | 84.5                       | 16.989                      | 5.71E-02                                     | 5.71E-02                                              |
| F15A8.6 (n = 4)                       | 2-AG (20:4), AA (20:4)          | 111.6                      | 25.404                      | 84.4                       | 21.224                      | 4.86E-01                                     | 4.86E-01                                              |
| FAAH-4 (n = 4)                        | 2-AG (20:4), AA (20:4)          | 1494.1                     | 291.197                     | 136.8                      | 19.021                      | 2.86E-02                                     | 2.86E-02                                              |
| K11G9.2 (DMSO<br>n = 3, JZL184 n = 4) | 2-AG (20:4), AA (20:4)          | 94.1                       | 36.373                      | 82.4                       | 19.307                      | 8.57E-01                                     | 8.57E-01                                              |
| Y71H2AM.13 (n = 4)                    | 2-AG (20:4), AA (20:4)          | 118.7                      | 32.524                      | 91.4                       | 19.765                      | 6.86E-01                                     | 4.86E-01                                              |

**Supplementary Table 3.** Quantitative data of MAGs, NAEs and FFAs levels in L4 staged N2 and  $\Delta faah-4$  animals as measured by targeted LC-MS/MS, related to **Fig. 6d** and **Supplementary Fig. 12a, b**. Statistics were performed using two-sided Mann-Whitney test.

| Species                         | Strain                        |                             |                               |                             | p-value<br>(N2 vs $\Delta faah-4$ ) |
|---------------------------------|-------------------------------|-----------------------------|-------------------------------|-----------------------------|-------------------------------------|
|                                 | N2 (n = 6)                    |                             | $\Delta faah-4$ (n = 7)       |                             |                                     |
|                                 | Mean<br>(pmol /mg<br>protein) | SE<br>(pmol /mg<br>protein) | Mean<br>(pmol /mg<br>protein) | SE<br>(pmol /mg<br>protein) |                                     |
| <b>Monoacylglycerol (MAG)</b>   |                               |                             |                               |                             |                                     |
| 16:0                            | 3.9                           | 0.519                       | 3.2                           | 0.176                       | 3.66E-01                            |
| 18:0                            | 2.0                           | 0.190                       | 2.1                           | 0.120                       | 4.45E-01                            |
| 18:1                            | 0.5                           | 0.036                       | 1.3                           | 0.127                       | 1.17E-03                            |
| 18:2                            | 0.4                           | 0.028                       | 1.1                           | 0.110                       | 1.17E-03                            |
| 20:4                            | 2.7                           | 0.206                       | 7.3                           | 0.489                       | 1.17E-03                            |
| 20:5                            | 6.4                           | 0.557                       | 16.2                          | 1.099                       | 1.17E-03                            |
| <b>N-acylethanolamine (NAE)</b> |                               |                             |                               |                             |                                     |
| 16:0                            | 11.1                          | 1.564                       | 16.4                          | 2.516                       | 1.38E-01                            |
| 16:1                            | 4.1                           | 0.647                       | 4.3                           | 0.589                       | 7.31E-01                            |
| 18:0                            | 4.5                           | 0.652                       | 6.8                           | 1.058                       | 1.01E-01                            |
| 18:1                            | 0.2                           | 0.006                       | 0.2                           | 0.011                       | 3.50E-02                            |
| 18:2                            | 0.8                           | 0.061                       | 0.9                           | 0.027                       | 3.66E-01                            |
| 20:4                            | 0.1                           | 0.009                       | 0.1                           | 0.010                       | 7.34E-02                            |
| 20:5                            | 1.1                           | 0.201                       | 1.2                           | 0.186                       | 7.31E-01                            |
| <b>Free fatty acid (FFA)</b>    |                               |                             |                               |                             |                                     |
| 16:0                            | 69.7                          | 6.240                       | 60.9                          | 2.629                       | 4.45E-01                            |
| 18:0                            | 55.2                          | 4.914                       | 45.9                          | 2.566                       | 1.38E-01                            |
| 18:1                            | 15.7                          | 2.104                       | 14.4                          | 1.556                       | >1.00E+00                           |
| 18:2                            | 8.2                           | 0.836                       | 8.6                           | 1.538                       | 7.31E-01                            |
| 20:4                            | 6.7                           | 0.447                       | 7.5                           | 0.560                       | 5.34E-01                            |
| 22:6                            | 0.8                           | 0.058                       | 0.9                           | 0.027                       | 6.28E-01                            |

**Supplementary Table 4.** Quantitative data of MAGs, NAEs and FFAs levels in L4 staged N2 animals treated with DMSO or JZL184 (50  $\mu$ M, 24 h) as measured by targeted LC-MS/MS, related to **Fig. 6e** and **Supplementary Fig. 12c, d**. Statistics were performed using two-sided Mann-Whitney test.

| Species                         | Treatment                     |                             |                               |                             | p-value<br>(DMSO vs<br>50 $\mu$ M<br>JZL184) |
|---------------------------------|-------------------------------|-----------------------------|-------------------------------|-----------------------------|----------------------------------------------|
|                                 | DMSO                          |                             | 50 $\mu$ M JZL184             |                             |                                              |
|                                 | Mean<br>(pmol /mg<br>protein) | SE<br>(pmol /mg<br>protein) | Mean<br>(pmol /mg<br>protein) | SE<br>(pmol /mg<br>protein) |                                              |
| <b>Monoacylglycerol (MAG)</b>   | <b>(n = 15)</b>               |                             | <b>(n = 10)</b>               |                             |                                              |
| 16:0                            | 2.2                           | 0.181                       | 2.6                           | 0.183                       | 1.78E-01                                     |
| 18:0                            | 2.4                           | 0.159                       | 2.7                           | 0.463                       | 8.49E-01                                     |
| 18:1                            | 1.0                           | 0.126                       | 2.2                           | 0.244                       | 3.02E-04                                     |
| 18:2                            | 1.1                           | 0.092                       | 1.9                           | 0.135                       | 5.93E-05                                     |
| 20:4                            | 6.8                           | 0.453                       | 11.1                          | 0.796                       | 1.19E-04                                     |
| 20:5                            | 15.0                          | 1.308                       | 20.9                          | 1.308                       | 4.44E-03                                     |
| <b>N-acylethanolamine (NAE)</b> | <b>(n = 15)</b>               |                             | <b>(n = 10)</b>               |                             |                                              |
| 16:0                            | 13.0                          | 2.134                       | 13.6                          | 2.332                       | 8.49E-01                                     |
| 16:1                            | 5.1                           | 0.450                       | 6.2                           | 0.764                       | 3.97E-01                                     |
| 18:0                            | 6.5                           | 0.629                       | 6.5                           | 0.863                       | 9.78E-01                                     |
| 18:1                            | 0.2                           | 0.018                       | 0.2                           | 0.013                       | 4.28E-01                                     |
| 18:2                            | 0.7                           | 0.074                       | 1.1                           | 0.091                       | 5.40E-03                                     |
| 20:4                            | 0.1                           | 0.011                       | 0.1                           | 0.006                       | 1.29E-01                                     |
| 20:5                            | 0.9                           | 0.171                       | 1.0                           | 0.102                       | 1.60E-01                                     |
| <b>Free fatty acid (FFA)</b>    | <b>(n = 14)</b>               |                             | <b>(n = 9)</b>                |                             |                                              |
| 16:0                            | 31.6                          | 4.648                       | 29.6                          | 3.465                       | 9.75E-01                                     |
| 18:0                            | 36.2                          | 6.093                       | 33.4                          | 3.733                       | 8.77E-01                                     |
| 18:1                            | 14.5                          | 2.536                       | 12.3                          | 1.730                       | 8.77E-01                                     |
| 18:2                            | 8.5                           | 1.491                       | 8.1                           | 1.224                       | >1.00E+00                                    |
| 20:4                            | 10.8                          | 1.177                       | 8.4                           | 1.083                       | 0.201003                                     |
| 22:6                            | 1.0                           | 0.091                       | 1.2                           | 0.103                       | 2.77E-01                                     |

**Supplementary Table 5.** Quantitative data of MAGs, NAEs and FFAs levels in L4 staged N2 and  $\Delta y53f4b.18$  animals as measured by targeted LC-MS/MS, related to **Supplementary Fig. 12e-g**. Statistics were performed using two-sided Mann-Whitney test.

| Species                         | Strain                        |                             |                               |                             | p-value<br>(N2 vs<br>$\Delta y53f4b.18$ ) |
|---------------------------------|-------------------------------|-----------------------------|-------------------------------|-----------------------------|-------------------------------------------|
|                                 | N2                            |                             | $\Delta y53f4b.18$            |                             |                                           |
|                                 | Mean<br>(pmol /mg<br>protein) | SE<br>(pmol /mg<br>protein) | Mean<br>(pmol /mg<br>protein) | SE<br>(pmol /mg<br>protein) |                                           |
| <b>Monoacylglycerol (MAG)</b>   | (n = 8)                       |                             | (n = 8)                       |                             |                                           |
| 16:0                            | 17.8                          | 3.165                       | 26.6                          | 3.778                       | 1.30E-01                                  |
| 18:0                            | 42.5                          | 6.797                       | 64.1                          | 8.428                       | 1.05E-01                                  |
| 18:1                            | 1.4                           | 0.196                       | 1.9                           | 0.367                       | 2.79E-01                                  |
| 18:2                            | 0.8                           | 0.072                       | 1.2                           | 0.088                       | 1.48E-02                                  |
| 20:4                            | 3.3                           | 0.581                       | 5.2                           | 0.794                       | 1.05E-01                                  |
| 20:5                            | 11.5                          | 2.137                       | 17.9                          | 3.096                       | 1.30E-01                                  |
| <b>N-acylethanolamine (NAE)</b> | (n = 8)                       |                             | (n = 8)                       |                             |                                           |
| 16:0                            | 27.8                          | 4.579                       | 28.3                          | 6.001                       | >0.999999                                 |
| 16:1                            | 5.4                           | 0.467                       | 8.0                           | 0.660                       | 6.99E-03                                  |
| 18:0                            | 22.4                          | 4.535                       | 21.9                          | 4.859                       | 7.98E-01                                  |
| 18:1                            | 0.1                           | 0.015                       | 0.2                           | 0.034                       | 1.30E-01                                  |
| 18:2                            | 0.4                           | 0.022                       | 0.7                           | 0.123                       | 3.82E-01                                  |
| 20:4                            | 0.1                           | 0.008                       | 0.2                           | 0.040                       | 1.95E-01                                  |
| 20:5                            | 1.7                           | 0.223                       | 2.4                           | 0.282                       | 1.05E-01                                  |
| <b>Free fatty acid (FFA)</b>    | (n = 9)                       |                             | (n = 8)                       |                             |                                           |
| 16:0                            | 14.5                          | 2.241                       | 17.5                          | 3.221                       | 6.06E-01                                  |
| 18:0                            | 11.2                          | 1.564                       | 12.8                          | 1.427                       | 4.23E-01                                  |
| 18:1                            | 6.2                           | 1.649                       | 7.1                           | 1.789                       | 8.15E-01                                  |
| 18:2                            | 2.2                           | 0.316                       | 2.5                           | 0.250                       | 4.81E-01                                  |
| 20:4                            | 4.6                           | 0.763                       | 5.9                           | 0.382                       | 1.67E-01                                  |
| 22:6                            | 0.2                           | 0.020                       | 0.2                           | 0.032                       | 4.81E-01                                  |

**Supplementary Table 6.** List of primers used in this study, related to **Fig. 3** and **4** and

**Supplementary Fig. 7, 9-11, and 12.**

| Gene              | Sequence (5' to 3')                            | Primer | Experiment                               |
|-------------------|------------------------------------------------|--------|------------------------------------------|
| <i>faah-4</i>     | ACGCGTCGACGCCACCATGGGGAATAACTTCTGGTCTACGTGGTC  | Fwd    | cloning into pRK5                        |
|                   | AAGGAAAAAAGCGGCCGCATGAAGAAGATTAACACGTTTCGAAATG | Rev    |                                          |
| <i>f13h6.3</i>    | ACGCGTCGACGCCACCATGGGTGGATTCTTGTCTCATCTGA      | Fwd    | cloning into pRK5                        |
|                   | AAGGAAAAAAGCGGCCGCAATCTTTGCCGACTTCTTCTTCCATAG  | Rev    |                                          |
| <i>f15a8.6</i>    | ACGCGTCGACGCCACCATGGGTGGTGCATTTTCATTCATAT      | Fwd    | cloning into pRK5                        |
|                   | AAGGAAAAAAGCGGCCGCGACGTTCTTTGAAGTAATCTTAATTTTC | Rev    |                                          |
| <i>y71h2am.13</i> | ACGCGTCGACGCCACCATGGGAGGAACAGTTTCAAAGCATA      | Fwd    | cloning into pRK5                        |
|                   | AAGGAAAAAAGCGGCCGCGAGATTCGGCGGTGGTCTGG         | Rev    |                                          |
| <i>faah-1</i>     | ACGCGTCGACGCCACCATGATTTTTTACTTGGTGCTTC         | Fwd    | cloning into pRK5                        |
|                   | AAGGAAAAAAGCGGCCGCTTTCCAGTACTGCGATTTTC         | Rev    |                                          |
| <i>faah-2</i>     | AAGGAAAAAAGCGGCCGCATGTTATTACTACTATTTCACTG      | Fwd    | cloning into pRK5                        |
|                   | ACGCGTCGACGCCACCATGTTATTACTACTATTTCACTG        | Fwd    |                                          |
|                   | AAGGAAAAAAGCGGCCGCTTTTCCGGTGACACCGCGTTC        | Rev    |                                          |
|                   | ATGGACCAATGTCCACGAGAGTGGA                      | Fwd    | mutagenesis of Sall                      |
|                   | CATTTGAATTAATCAAAGGTCTTCCC                     | Rev    |                                          |
| <i>faah-3</i>     | ACGCGTCGACGCCACCATGTGGTTTTTCTACGTGCGC          | Fwd    | cloning into pRK5                        |
|                   | AAGGAAAAAAGCGGCCGCATGTGTTCTACTATACAATCCG       | Rev    |                                          |
| <i>faah-5</i>     | ACGCGTCGACGCCACCATGTCCAAAATGGAGGATAAG          | Fwd    | cloning into pRK5                        |
|                   | AAGGAAAAAAGCGGCCGCTTTCTTTGGAGCAATCTTCTTC       | Rev    |                                          |
| <i>faah-6</i>     | AAGGAAAAAAGCGGCCGCATGGGGAATATTCATCAAAAACC      | Fwd    | cloning into pRK5                        |
|                   | ACGCGTCGACGCCACCATGGGGAATATTCATCAAAAACC        | Fwd    |                                          |
|                   | AAGGAAAAAAGCGGCCGCAATCCTTTCCGGTTACTCATTG       | Rev    |                                          |
|                   | CCAACGGCCAGTGGACTCGAATTTTA                     | Fwd    | mutagenesis of Sall                      |
|                   | GTCTTGAAAAACATCTGTGCAACTTG                     | Rev    |                                          |
| <i>y53f4b.18</i>  | ACGCGTCGACGCCACCATGGCGGTGCCGTATCGCC            | Fwd    | cloning into pRK5                        |
|                   | AAGGAAAAAAGCGGCCGCAAGTGGTCCAGCAGGAGTCCATC      | Rev    |                                          |
| <i>y41d4a.6</i>   | ACGCGTCGACGCCACCATGCACAGAATCGAAAGTTC           | Fwd    | cloning into pRK5                        |
|                   | AAGGAAAAAAGCGGCCGCTTTCCGAATTAACCATCC           | Rev    |                                          |
|                   | GATTTAGGTGACACTATAG                            | Fwd    | sequencing pRK5                          |
|                   | TGTAACCATTATAAGCTG                             | Rev    |                                          |
|                   | CGTGTCGAGACCCAGTAACG                           | Fwd    | genotyping for <i>faah-4</i> deletion    |
|                   | GCGCCTTAATGGCATGAATA                           | Rev    |                                          |
|                   | CGAAGGAGATTTGCTTCTGAAA                         | Fwd    |                                          |
|                   | ACCGACGGTATCCTGCTCTT                           | Fwd    | genotyping for <i>y53f4b.18</i> deletion |
|                   | GAGACCTTTGGATATTTGTTGGA                        | Rev    |                                          |
|                   | TAACCGTTGCCTTGCTCTCT                           | Fwd    |                                          |

## Supplementary Figures

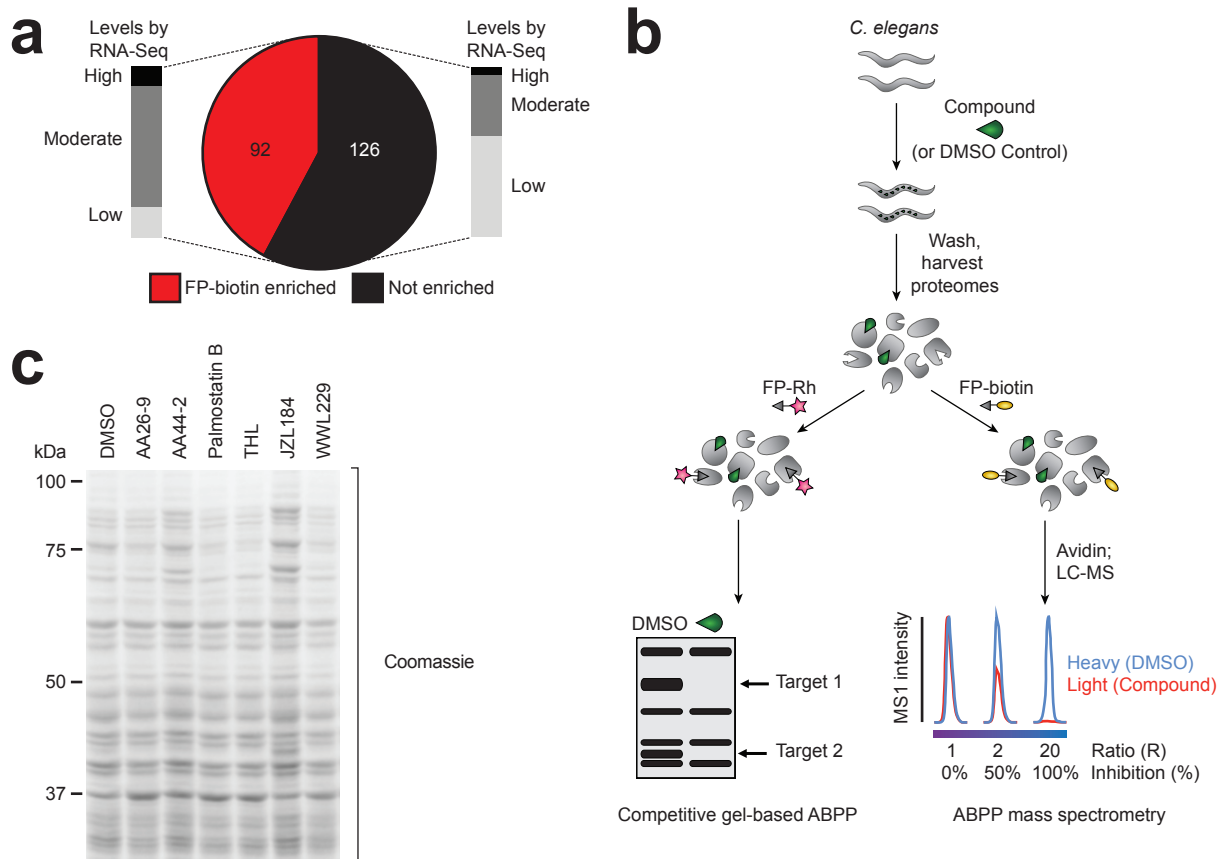

**Supplementary Figure 1.** (a) 92 (42%) of the 218 predicted SHs in *C. elegans* were enriched and identified by the FP-biotin probe. Also summarized are relative expression levels of FP-biotin-enriched or not enriched SHs as estimated by RNA-Seq<sup>1</sup>. (b) General schematic for the identifying targets of SH-directed inhibitors in *C. elegans* by competitive ABPP. Animals are treated with DMSO (control) or compound for 24 h *in vivo*, extensively washed to remove compound, and homogenized. Lysates are then either incubated with 1) FP-rhodamine and SH activities visualized by SDS-PAGE and in-gel fluorescence scanning, where loss of a fluorescent signal indicates SH inhibition by the test compound; or 2) FP-biotin for enrichment and identification of inhibitor-sensitive SHs by MS-based ABPP experiments, where animals are first isotopically labelled with heavy <sup>15</sup>N or light <sup>14</sup>N Op50 bacteria, and then treated with DMSO or compound for 24 h, respectively. After homogenization, heavy and light proteomes are combined, incubated with FP-biotin, and FP-reactive proteins enriched by avidin chromatography and identified and quantified by MS. Peptides with high heavy-to-light ratios designate SHs that are inhibited by the test compound. (c) Coomassie stain of fluorescent ABPP gel associated with Fig. 1d is representative of 2 independent experiments.

- 1 Rangaraju, S. *et al.* Suppression of transcriptional drift extends *C. elegans* lifespan by postponing the onset of mortality. *Elife* 4, e08833, doi:10.7554/eLife.08833 (2015).

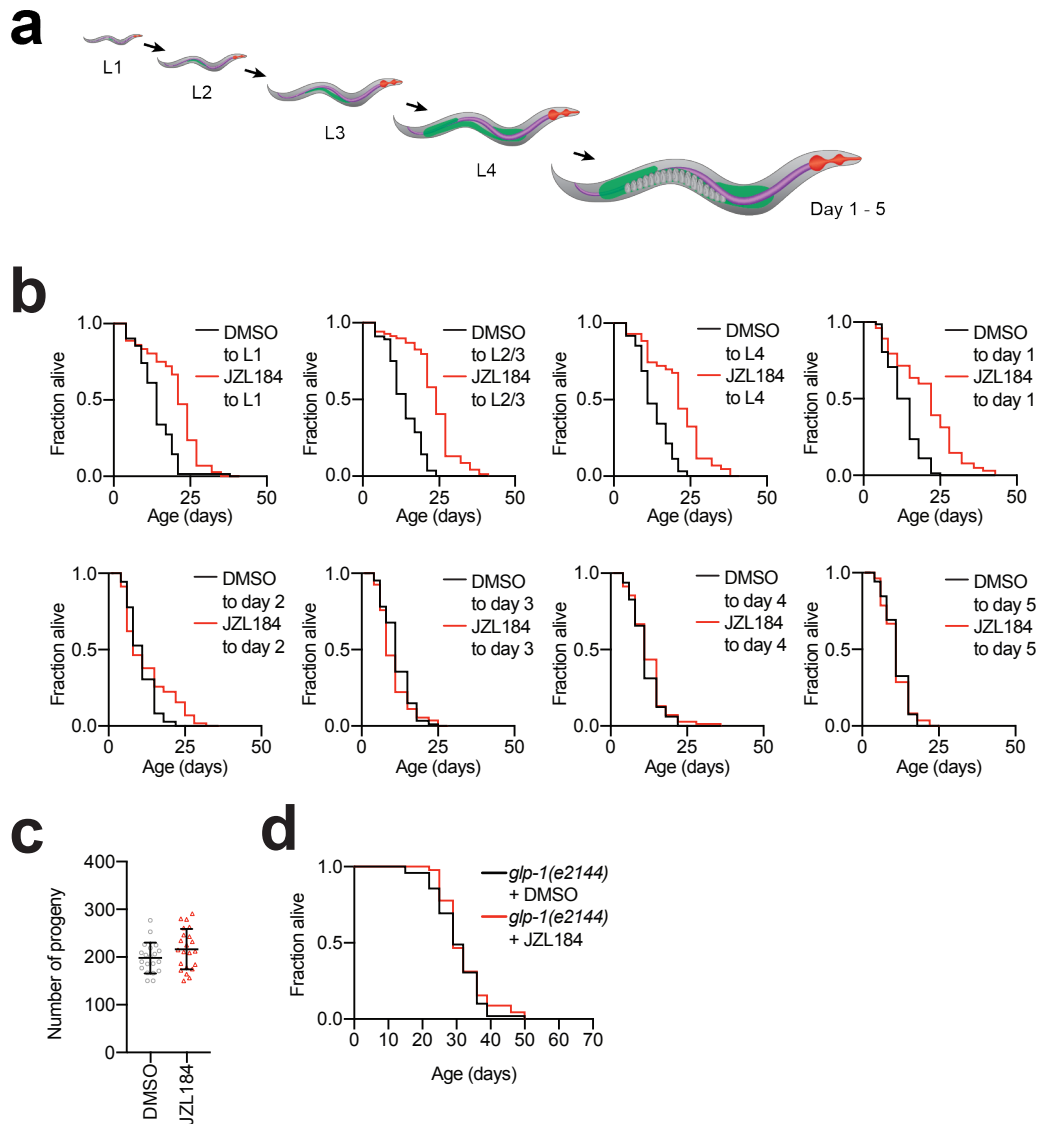

**Supplementary Figure 2. JZL184 treatment during *C. elegans* development and early adulthood extends lifespan.** (a) Illustration of *C. elegans* developmental stages. (b) Worms at distinct developmental stages were administered a single dose of JZL184 (50  $\mu$ M). Stages included larval (L1, L2/3, and L4), reproductive (day 1 to 4 adult), and post-reproductive stages (day 5 adult). *C. elegans* treated with JZL184 past the first half of the reproductive stage did not experience a significant increase in lifespan. The data are representative of 3 (L1, L2/3, L4, day 2-4), 5 (day 5) or 6 (day 1) independent experiments (at least 28 worms per condition). Two-sided Mantel-Haenszel version of the log-rank test performed relative to DMSO control. (c) Brood size analysis of N2 worms treated with DMSO control or JZL184 (50  $\mu$ M). *C. elegans* were maintained in liquid culture and transferred daily until day 5 to measure the number of progeny. Data is represented as mean  $\pm$  s.d. (DMSO  $n = 20$ , JZL184  $n = 22$ ,  $P = 0.1258$ , two-sided unpaired t test). Data are from 4 independent experiments. (d) Lifespan curve of *glp-1(e2144)* mutant worms treated with FUDR and DMSO or JZL184 (50  $\mu$ M) *glp-1* (DMSO  $n = 49$  worms, JZL184  $n = 45$  worms,  $P = 0.4170$  compared to *glp-1* DMSO control, two-sided Mantel-Haenszel version of the log-rank test). For d, results are representative of 2 independent experiments. Statistics for b and d are provided in **Supplementary Dataset 2**.



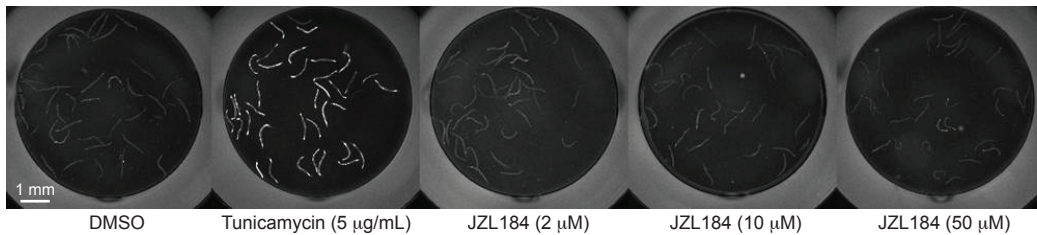

**Supplementary Figure 3. JZL184 does not induce endoplasmic reticulum UPR.**

Representative fluorescence microscopy images of *hsp-4::gfp* animals treated with the indicated concentrations of JZL184 for 24 h. Tunicamycin (5 µg/mL) was used as a positive control for visualizing induction of the endoplasmic reticulum UPR. Data is representative of 2 independent experiments.

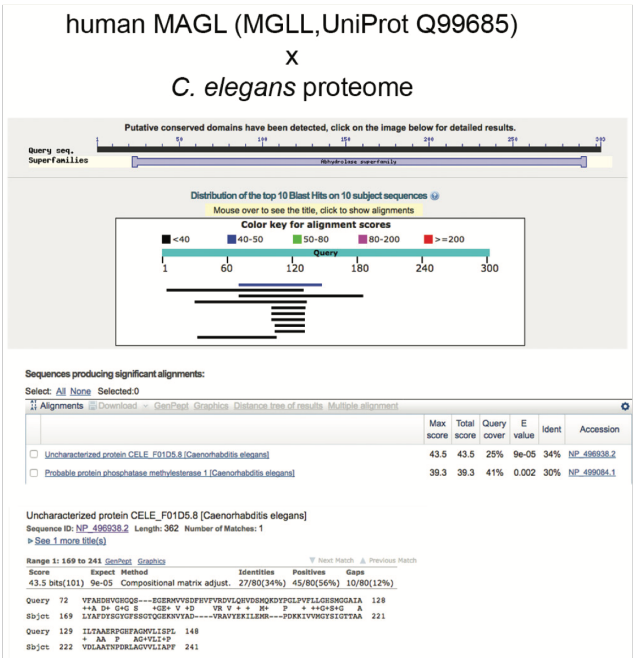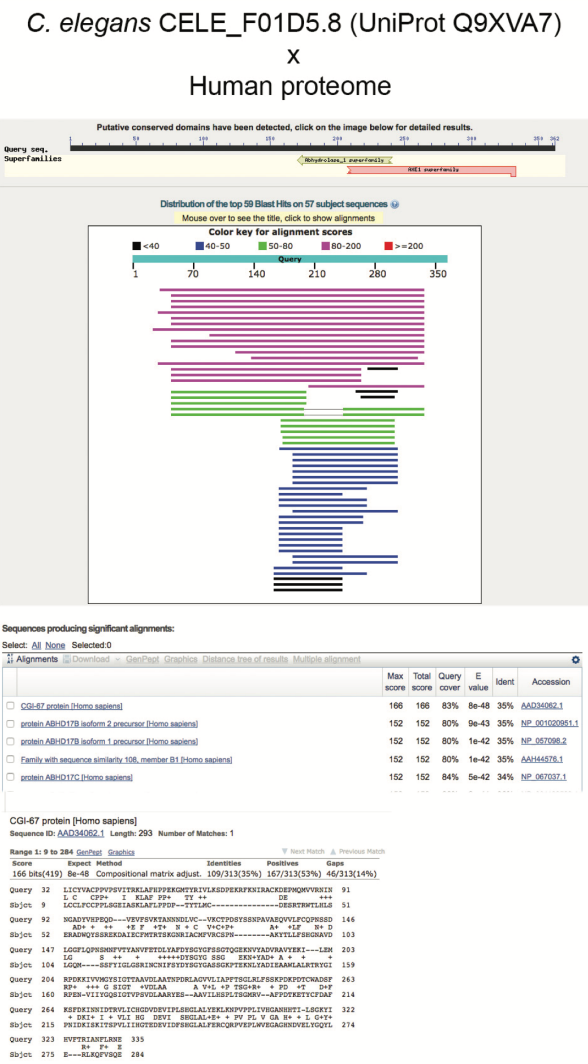

**Supplementary Figure 4. BLAST search reveals that *C. elegans* lacks an orthologue of human MAGL (or MGLL).** BLAST searching the protein sequence for human MAGL against the *C. elegans* database returned a weak homology match (34% identity across only 25% of the MAGL protein sequence) to F01D5.8 (left panels). A reciprocal BLAST search of the protein sequence for F01D5.8 against the human database revealed that this protein is an orthologue of the CGI-67/ABHD17 sub-clan of SHs (right panels), for which a much higher homology was observed (35% identity across ~90% of the CGI-67 protein sequence).

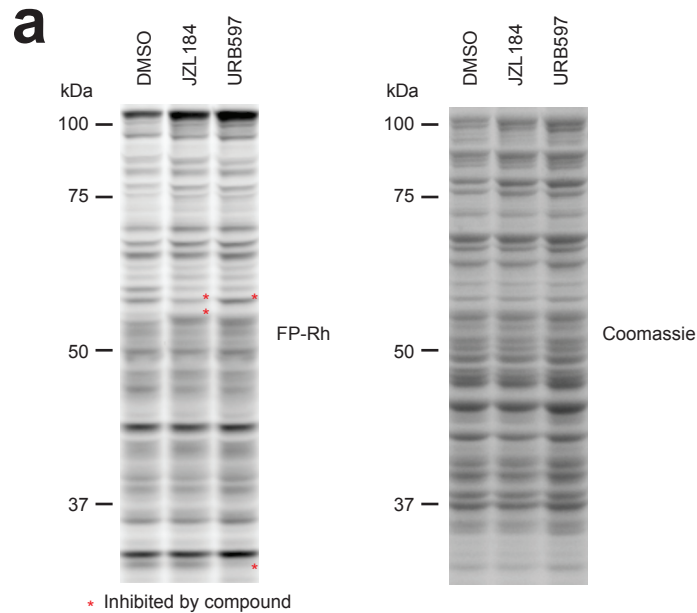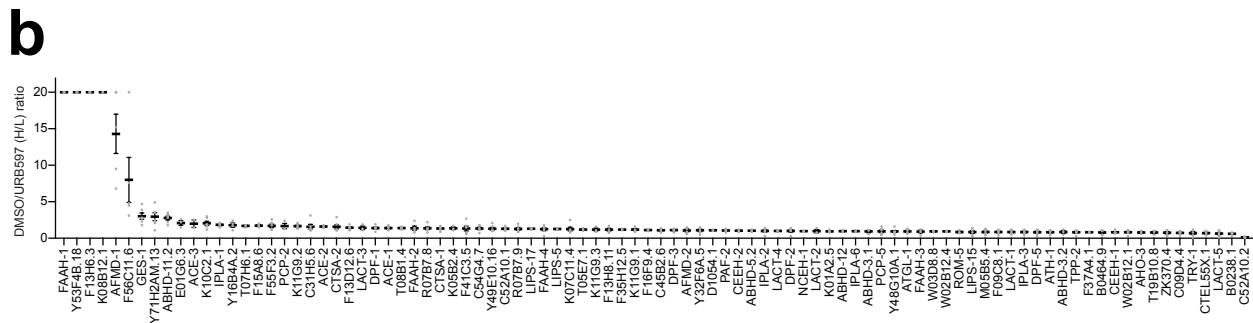

**Supplementary Figure 5. URB597 inhibitory profile in *C. elegans in vivo*.** (a) Gel-based ABPP of *C. elegans* proteins inhibited by JZL184 or URB597 (50  $\mu$ M, 24 h) *in vivo* as measured by FP-rhodamine. Data is representative of 2 independent experiments. (b) FP-biotin enrichment and identification of SHs endogenously inhibited by URB597 (50  $\mu$ M, 24 h) in *C. elegans*. MS-ABPP experiments were performed as described in the legend to **Fig. 3** and in the **Online Methods**. Data represent the mean of median ratios + s.e.m. for peptides quantified for each protein ( $n = 3$  independent experiments).

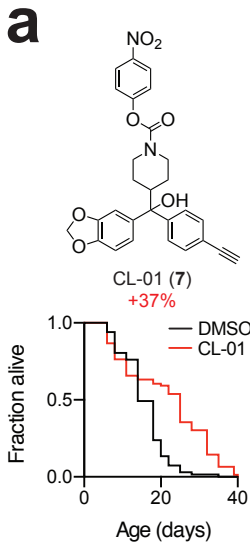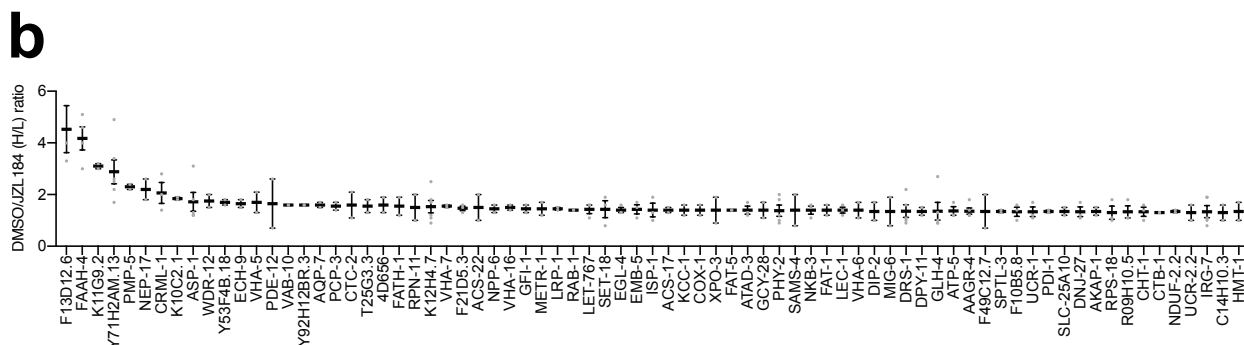

**Supplementary Figure 6. Proteomic analysis with CL-01 (7) probe.** (a) The CL-01 probe, a clickable analogue of JZL184, substantially extends lifespan. Kaplan-Meier plot revealing ~40% lifespan extension by CL-01 (50  $\mu$ M) (DMSO  $n = 67$ , CL-01  $n = 76$ ,  $P = 1.20E-06$  compared DMSO control, two-sided Mantel-Haenszel version of the log-rank test). The result is representative of 4 independent experiments. Statistics for **a** are provided in **Supplementary Dataset 2**. (b) Competitive MS-ABPP analysis showing the *in vivo* inhibition profile for JZL184 measured with the CL-01 probe. Isotopically labeled  $^{15}\text{N}$  or light  $^{14}\text{N}$  animals were treated with JZL184 (50  $\mu$ M) or DMSO, respectively, on day 1 of adulthood for 24 h and CL-01 (50  $\mu$ M, 18 h), followed by copper-catalyzed azide-alkyne cycloaddition (CuAAC or click) chemistry<sup>2</sup> conjugation to biotin-azide. Ratios shown for top 75 proteins. Data represent the mean of median ratios + s.e.m. for peptides quantified for each protein ( $n = 3$  independent experiments).

- 2 Rostovtsev, V. V., Green, L. G., Fokin, V. V. & Sharpless, K. B. A stepwise Huisgen cycloaddition process: copper(I)-catalyzed regioselective "ligation" of azides and terminal alkynes. *Angew Chem Int Ed Engl* **41**, 2596-2599, doi:10.1002/1521-3773(20020715)41:14<2596::AID-ANIE2596>3.0.CO;2-4 (2002).

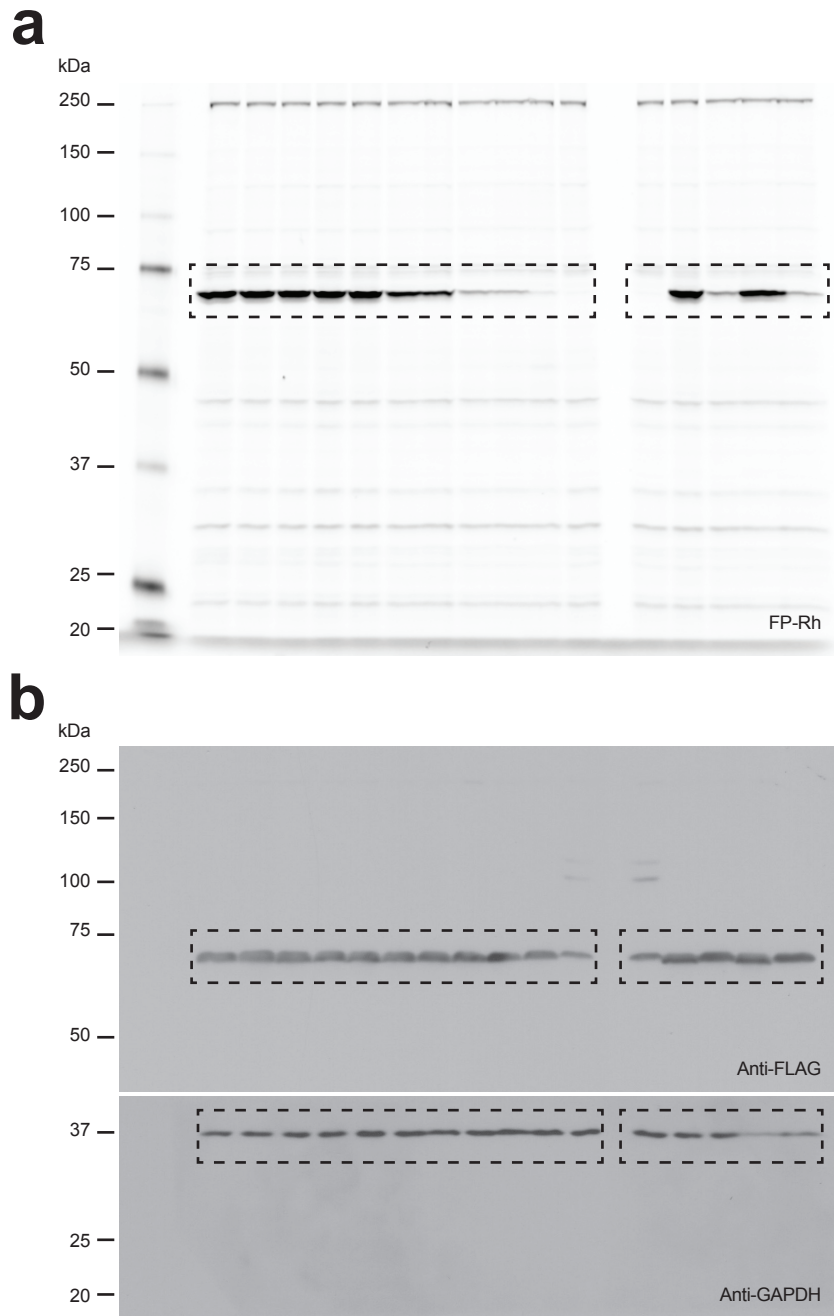

**Supplementary Figure 7.** Full length images of (a) FP-Rh or (b) Western blot analysis of FLAG-FAAH-4 or GAPDH in lysate samples. Data are representative of 3 independent samples. Cropped gel data for right and left lanes are shown in **Fig. 4c** and **4d**, respectively.

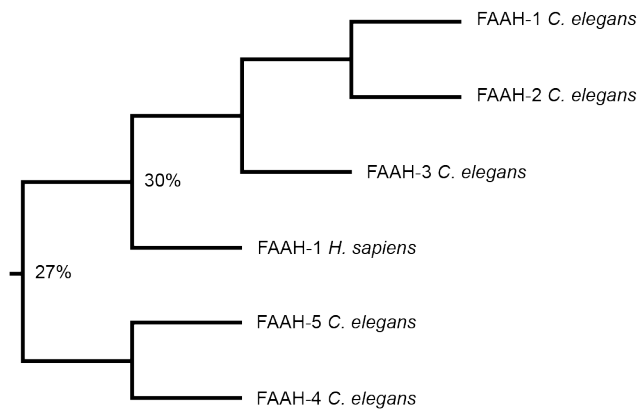

**Supplementary Figure 8. Homology between amidases.** Dendrogram depicting relatedness of *C. elegans* FAAHs to human FAAH-1. Note that human FAAH-1 is near-equally related (27-30%) to the various *C. elegans* FAAH proteins.

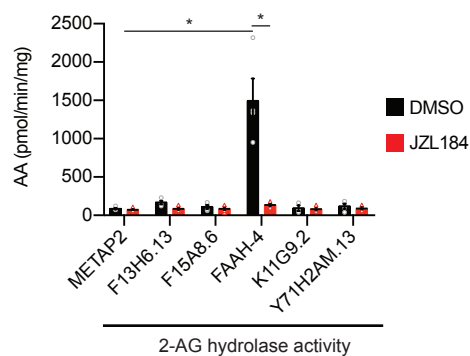

**Supplementary Figure 9. 2-AG hydrolytic activity of SHs inhibited by JZL184 in vivo.**

Recombinant SHs or control protein METAP2 (5 µg of lysate) were expressed by transient transfection in HEK293T cells and their 2-AG hydrolytic activities measured in presence of JZL184 (50 µM, 30 min pre-treatment) or DMSO. Following treatment, AEA or 2-AG (50 µM) was added to the lysates and the reaction proceeded for 20 min at 37 °C prior to quenching. Hydrolytic activities were determined by quantifying arachidonic acid (AA) production relative to a d<sub>8</sub>-arachidonic acid (AA) internal standard by LC-MS/MS. Data represent the mean ± s.e.m. *n* = 3 (K11G9.2 DMSO) or 4 (all other conditions) independent samples per group. \**P* = 2.86E-02 (two-sided Mann-Whitney test performed relative to METAP2 or DMSO control). The *P* values are provided in **Supplementary Table 2**.

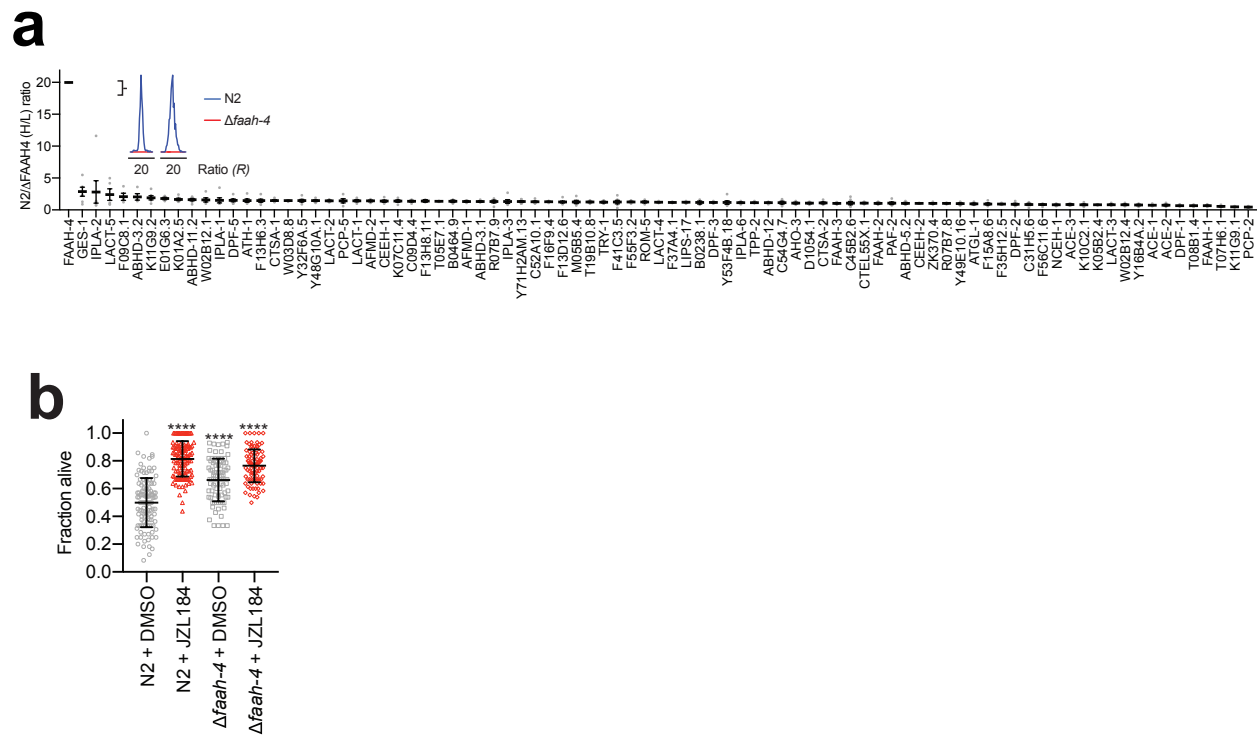

**Supplementary Figure 10. Deletion of *faah-4* increases oxidative stress resistance. (a)** Confirmation of selective loss of FAAH-4 expression in CRISPR/Cas9-based gene knockout of *faah-4* in *C. elegans* by MS-based ABPP. Other SHs were largely unaffected by *faah-4* disruption. Data represent the mean of median ratios + s.e.m. for peptides quantified for each protein ( $n = 3$  independent experiments). **(b)** Loss of FAAH-4 increases resistance to oxidative stress induced by paraquat (50 mM) for 48 hours. Data represent the mean  $\pm$  s.d. (N2 DMSO  $n = 118$ , N2 JZL184  $n = 120$ ,  $\Delta faah-4$  DMSO  $n = 86$ ,  $\Delta faah-4$  JZL184  $n = 93$ , \*\*\*\* $P < 1.00E-15$  for N2 JZL184, \*\*\*\* $P = 1.24E-10$  for  $\Delta faah-4$  DMSO, \*\*\*\* $P < 1.00E-15$  for  $\Delta faah-4$  JZL184, two-sided Mann-Whitney test performed relative to N2 + DMSO, from 6 independent experiments)



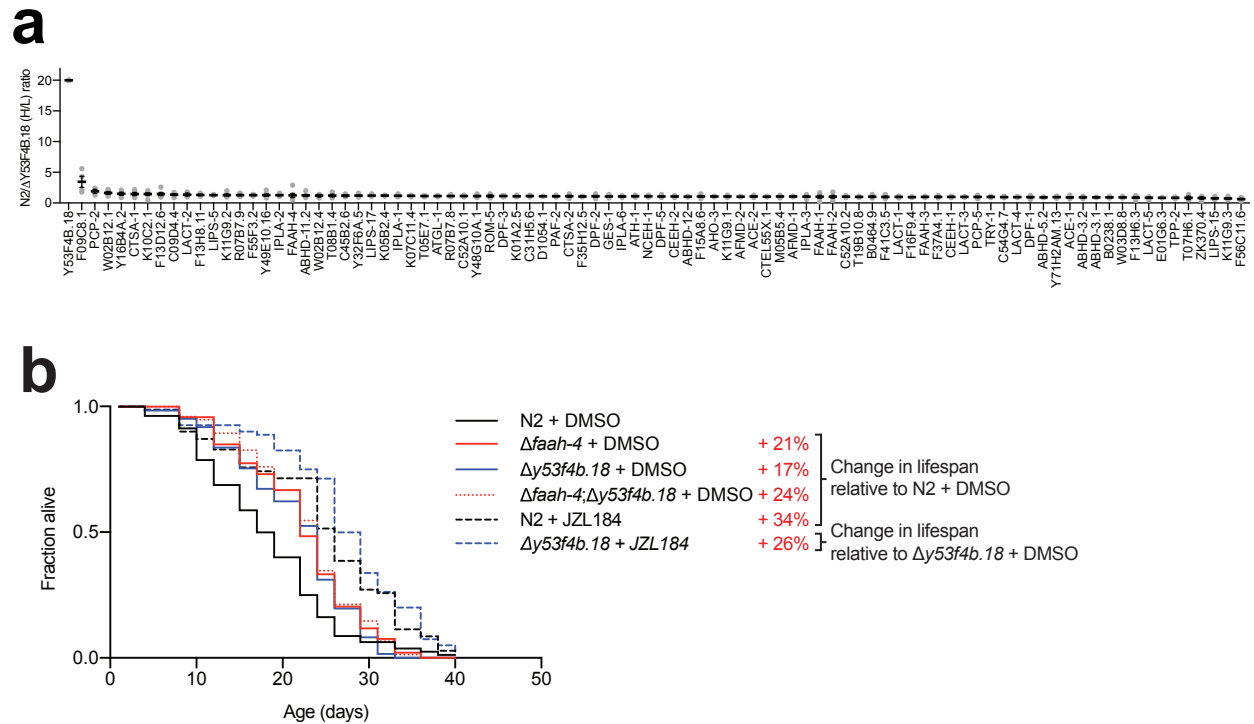

**Supplementary Figure 11. Y53F4B.18 regulates lifespan in *C. elegans* and may function within the same pathway as FAAH-4. (a) Confirmation of selective loss of Y53F4B.18 in CRISPR/Cas9-based gene knockout of *y53f4b.18* in *C. elegans* by MS-based ABPP. Data represent the mean of median ratios + s.e.m. for peptides quantified for each protein ( $n = 3$  independent experiments). (b) Lifespan curves for N2 animals treated with JZL184 (50  $\mu$ M) or DMSO,  $\Delta faah-4$ ,  $\Delta y53f4b.18$  animals treated with JZL184 (50  $\mu$ M) or DMSO, and  $\Delta faah-4;\Delta y53f4b.18$ .  $\Delta faah-4$ ,  $\Delta y53f4b.18$ , and  $\Delta faah-4;\Delta y53f4b.18$  (N2 DMSO  $n = 80$ ,  $\Delta faah-4$  DMSO  $n = 93$ ,  $\Delta y53f4b.18$  DMSO  $n = 61$ ,  $\Delta faah-4;\Delta y53f4b.18$  DMSO  $n = 75$ , N2 JZL184  $n = 70$ ,  $\Delta y53f4b.18$  JZL184  $n = 80$ ,  $P = 6.38E-03$  for N2 DMSO vs  $\Delta faah-4$  DMSO,  $P = 3.99E-02$  for N2 DMSO vs  $\Delta y53f4b.18$  DMSO,  $P = 4.12E-03$  for N2 DMSO vs  $\Delta faah-4;\Delta y53f4b.18$  DMSO,  $P = 6.94E-06$  for N2 DMSO vs N2 JZL184,  $P = 1.99E-07$  for  $\Delta y53f4b.18$  DMSO vs  $\Delta y53f4b.18$  JZL184, two-sided Mantel-Haenszel version of the log-rank test). This result is representative of 3 independent experiments. Statistics for **b** are provided in **Supplementary Dataset 2**.**

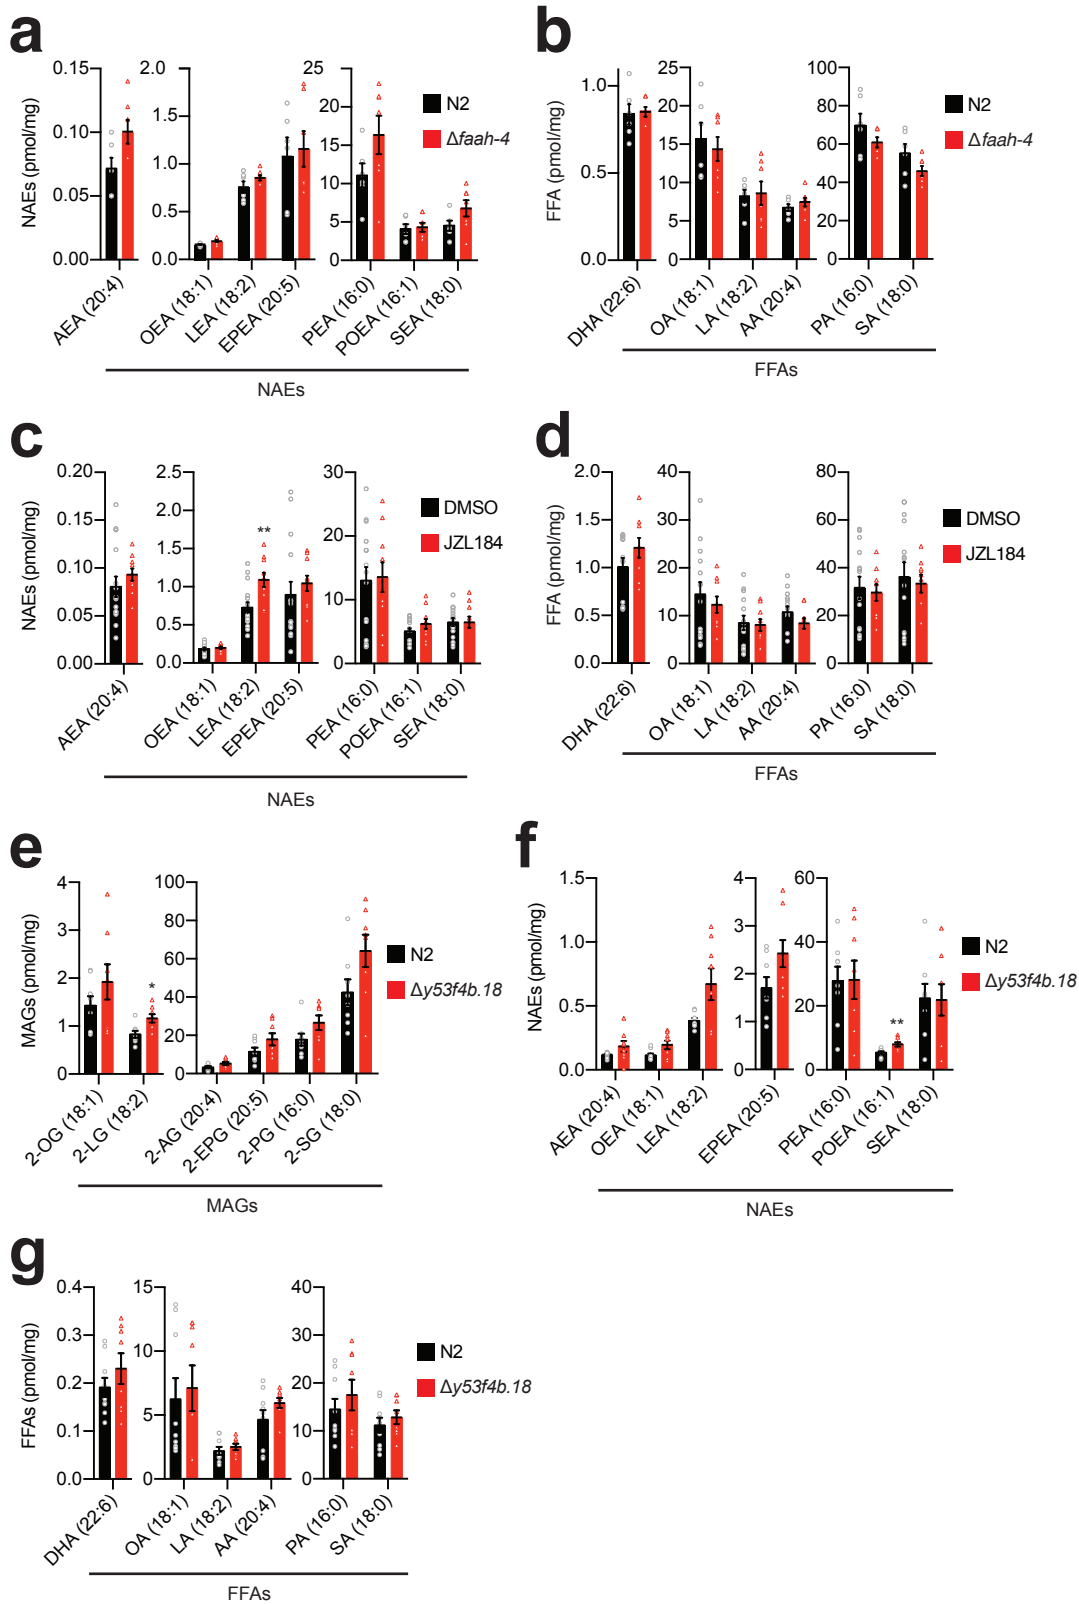

**Supplementary Figure 12. Lipids in  $\Delta faah-4$  animals, N2 animals treated with JZL184 and  $\Delta y53f4b.18$  animals. N-acyl ethanolamines and free fatty acids are largely unchanged in (a, b)**

*Δfaah-4* animals and animals treated with **(c, d)** JZL184. **(c-e)** MAGs, NAEs and FFAs in *Δy53f4b.18* animals are mostly unchanged compared to N2 with the exception of POEA and 2-LG. Quantification of lipids from indicated groups of animals was performed by targeted LC-MS/MS. AEA, anandamide (C20:4); OEA, oleoylethanolamide (C18:1); LEA, linoleoyl ethanolamide (C18:2); EPEA, eicosapentaenoyl ethanolamide (C20:5); PEA, palmitoylethanolamide (16:0); POEA, palmitoleoyl ethanolamide (C16:1); SEA, stearoyl ethanolamide (18:0); DHA, docosahexaenoic acid (22:6); OA, oleic acid (18:1); LA, linoleic acid (18:2); PA, palmitic acid (16:0); SA, stearic acid (18:0); AA, arachidonic acid (20:4); 2-OG, 2-oleoylglycerol (C18:1); 2-LG, 2-linoleoylglycerol (C18:2); 2-PG, 2-palmitoylglycerol (C16:0); 2-SG, 2-stearoylglycerol (C18:0); 2-AG, 2-arachidonoylglycerol (C20:4); 2-EPG, 2-eicosapentaenoylglycerol (C20:5). The data represent the mean  $\pm$  s.e.m. For **a** and **b**,  $n = 6$  (N2) or 7 (*Δfaah-4*) independent samples per group. For **c** and **d**,  $n = 9$  (FFAs JZL184), 10 (NAEs JZL184), 14 (FFAs DMSO), or 15 (NAEs DMSO) independent samples per group. For **e** and **g**,  $n = 9$  (FFAs N2) or 8 (all other conditions) independent samples per group.  $**P < 0.01$  (two-sided Mann-Whitney test performed relative to N2 or DMSO control). The  $P$  values for **a-b**, **c-d**, and **e-g** are provided in **Supplementary Table 3, 4** and **5**, respectively.

## Supplementary Dataset Legends (see accompanying excel files)

**Supplementary Dataset 1. List of predicted *C. elegans* SHs, FP-enriched SHs, and gene expression data, related to Figure 1.** (Tab 1): Compiled list of predicted *C. elegans* SHs.

UniProtID, WormBase identifier, description, Pfam annotation (family), and sequence are shown for each protein. The list of predicted SHs was generated by cross referencing the proteins with a non-redundant database and identifying *C. elegans* proteins with Pfam families that match curated mammalian SH families. Manually identified entries were added. (Tab 2): List of FP-enriched predicted *C. elegans* SHs with corresponding averaged and median heavy-to-light ratios from 6 independent biological replicates divided into membrane and soluble samples. Combined SILAC ratio, s.d., and s.e.m. were calculated from 12 membrane and soluble replicates. (Tab 3): RNA-Seq data for putative SHs from day 1 *C. elegans* which can be found in the NCBI under the ID code GEO: GSE63528.

**Supplementary Dataset 2. Lifespan data.** Each tab contains strains, mean lifespan in days, number of animals tested, percent change in lifespan compared to control, and *P*-value. Mean lifespan and *P*-value were calculated by two-sided Mantel-Haenszel version of the log-rank test. Unless stated, compound treatment occurred on day 1 of adulthood. (Tab 1): Inhibitor screen results. Includes percent change in lifespan of animals treated with drug compared to animals treated with DMSO control (corresponding to experiment number). (Tab 2): Top compounds that extend lifespan. Compounds were selected based on initial screen results. Corresponding DMSO data can be found by experiment number. ( $n = 3$  biological replicates per compound). (Tab 3): Lifespan statistics from longevity effector mutants treated with JZL184 (50  $\mu$ M) compared to DMSO (control). ( $n \geq 2$  biological replicates per condition) (Tab 4): Lifespan statistics from dose response experiments. Animals were treated with 0.001 to 50  $\mu$ M JZL184 or DMSO (control). Corresponding DMSO data can be found by experiment number. ( $n \geq 3$

biological replicates per concentration of JZL184). (Tab 5): Lifespan statistics from time course experiments. Animals treated with 50  $\mu$ M JZL184 were compared to animals given DMSO (control) from the L1 developmental stage to day 5 of adulthood. ( $n \geq 3$  biological replicates per stage). (Tab 6): Lifespan statistics from JZL184 analogs and CL-01 probe. Corresponding DMSO data can be found by experiment number. ( $n \geq 4$  biological replicates per analog). (Tab 7): Lifespan statistics from CL-01 probe. Corresponding DMSO data can be found by experiment number. ( $n \geq 4$  biological replicates). (Tab 8): Lifespan statistics from *faah-4* and *y53f4b.18* deletion animals. Described from top to bottom rows: percent change in lifespan of *faah-4* deletion animals as compared to N2 animals, *y53f4b.18* deletion animals as compared to N2 animals, *faah-4; y53f4b.18* deletion animals as compared to N2 animals, N2 animals treated with JZL184 (50  $\mu$ M) as compared to DMSO, *faah-4* deletion animals treated with JZL184 (50  $\mu$ M) as compared to DMSO, *y53f4b.18* deletion animals treated with JZL184 (50  $\mu$ M) as compared to DMSO, *faah-4; y53f4b.18* deletion animals treated with JZL184 (50  $\mu$ M) as compared to DMSO, ( $n \geq 3$  biological replicates per condition).

**Supplementary Dataset 3. Proteomic data, related to Figures 3, 4, and Supplementary Figure 7.** (Tab 1-5, 7-8): Competitive ABPP-MS data using FP-biotin (5  $\mu$ M, 2 h). Average heavy-to-light ratios from experiments in which  $^{14}$ N *C. elegans* were treated with JZL184 (50  $\mu$ M, 24 h) (Tab 1), ALC1 (50  $\mu$ M, 24 h) (Tab 2), ALC3 (50  $\mu$ M, 24 h) (Tab 3), ALC6 (50  $\mu$ M, 24 h) (Tab 4), WWL154 (50  $\mu$ M, 24 h) (Tab 5), URB597 (50  $\mu$ M, 24 h) (Tab 7), or CL-01 (50  $\mu$ M, 24 h) (Tab 8) and  $^{15}$ N were treated with DMSO (24 h). (Tab 6): Comparative ABPP-MS data using FP-biotin (5  $\mu$ M, 2 h). Average heavy-to-light ratios from  $^{14}$ N *faah-4* deletion and  $^{15}$ N N2 *C. elegans*. (Tab 9): Competitive ABPP-MS data using CL-01 (50  $\mu$ M, 18 h). Average heavy-to-light ratios from experiments in which  $^{14}$ N *C. elegans* were treated with JZL184 (50  $\mu$ M, 24 h) and CL-01 (50  $\mu$ M, 18 h) and  $^{15}$ N were treated with DMSO (24 h) and CL-01 (50  $\mu$ M, 18 h). Data are from 2 (ALC1, ALC3), 3 (ALC6, WWL154,  $\Delta$ *faah-4*,  $\Delta$ *y53f4b.18*, URB597, JZL184 CL-01, 4

(JZL184), and 6 (CL-01) independent samples. Combined SILAC ratio, s.d., and s.e.m. were calculated from membrane, soluble, and whole lysate replicates.

**Supplementary Dataset 4. Proteomic data, related to Figures 3, 4, and Supplementary**

**Table 7.** (Tabs 1-34): ABPP-MS data using FP-biotin (5  $\mu$ M, 2 h) for analysis of *C. elegans* treated with the following compounds at 50  $\mu$ M for 24 h: JZL184 (Tabs 1-8), ALC1 (Tabs 9-12), ALC 3 (Tabs 13-16), ALC6 (Tabs 17-22), WWL154 (Tabs 23-28), or URB597 (Tabs 29-34). (Tabs 35-40): ABPP-MS data using FP-biotin (5  $\mu$ M, 2 h) for analysis of *faah-4* deletion animals. (Tabs 41-46): ABPP-MS data using FP-biotin (5  $\mu$ M, 2 h) for analysis of *y53f4b.18* deletion animals. (Tabs 47-59): ABPP-MS data using CL-01 (50  $\mu$ M, 24 h) (Tabs 47-53) or JZL184 (50  $\mu$ M, 24 h) and CL-01 (50  $\mu$ M, 18 h) (Tabs 54-59). Data sets by replicate, related to **Supplementary Table 3**. Each tab displays the median heavy-to-light ratios for all quantified tryptic peptides per protein.

**Supplementary Dataset 5. Proteomic data, related to Figure 3.** (Tab 1-2): Averaged heavy-to-light ratios of competitive ABPP-MS data sets for membrane (Tab 1) and soluble (Tab 2) proteomes of *C.elegans* treated with compounds (50  $\mu$ M, 24 h) using FP-biotin (5  $\mu$ M, 2 h), related to **Supplementary Table 3**. Includes stdev and number of quantified peptides per condition. Data are from 2 (ALC1, ALC3), 3 (ALC6, WWL154, URB597, JZL184 CL-01, and 4 (JZL184) independent samples.
